# Supplementary material for: Optimizing the Adipogenic Induction Protocol Using Rosiglitazone Improves the Physiological Parameters and Differentiation Capacity of Adipose Tissue-Derived Mesenchymal Stem Cells for Horses, Sheep, Dogs, Murines, and Humans
Source: MDPI journal article supplement (doi:10.3390/ani13203224), 2023-10-15
Supplement: s1 [file s1]

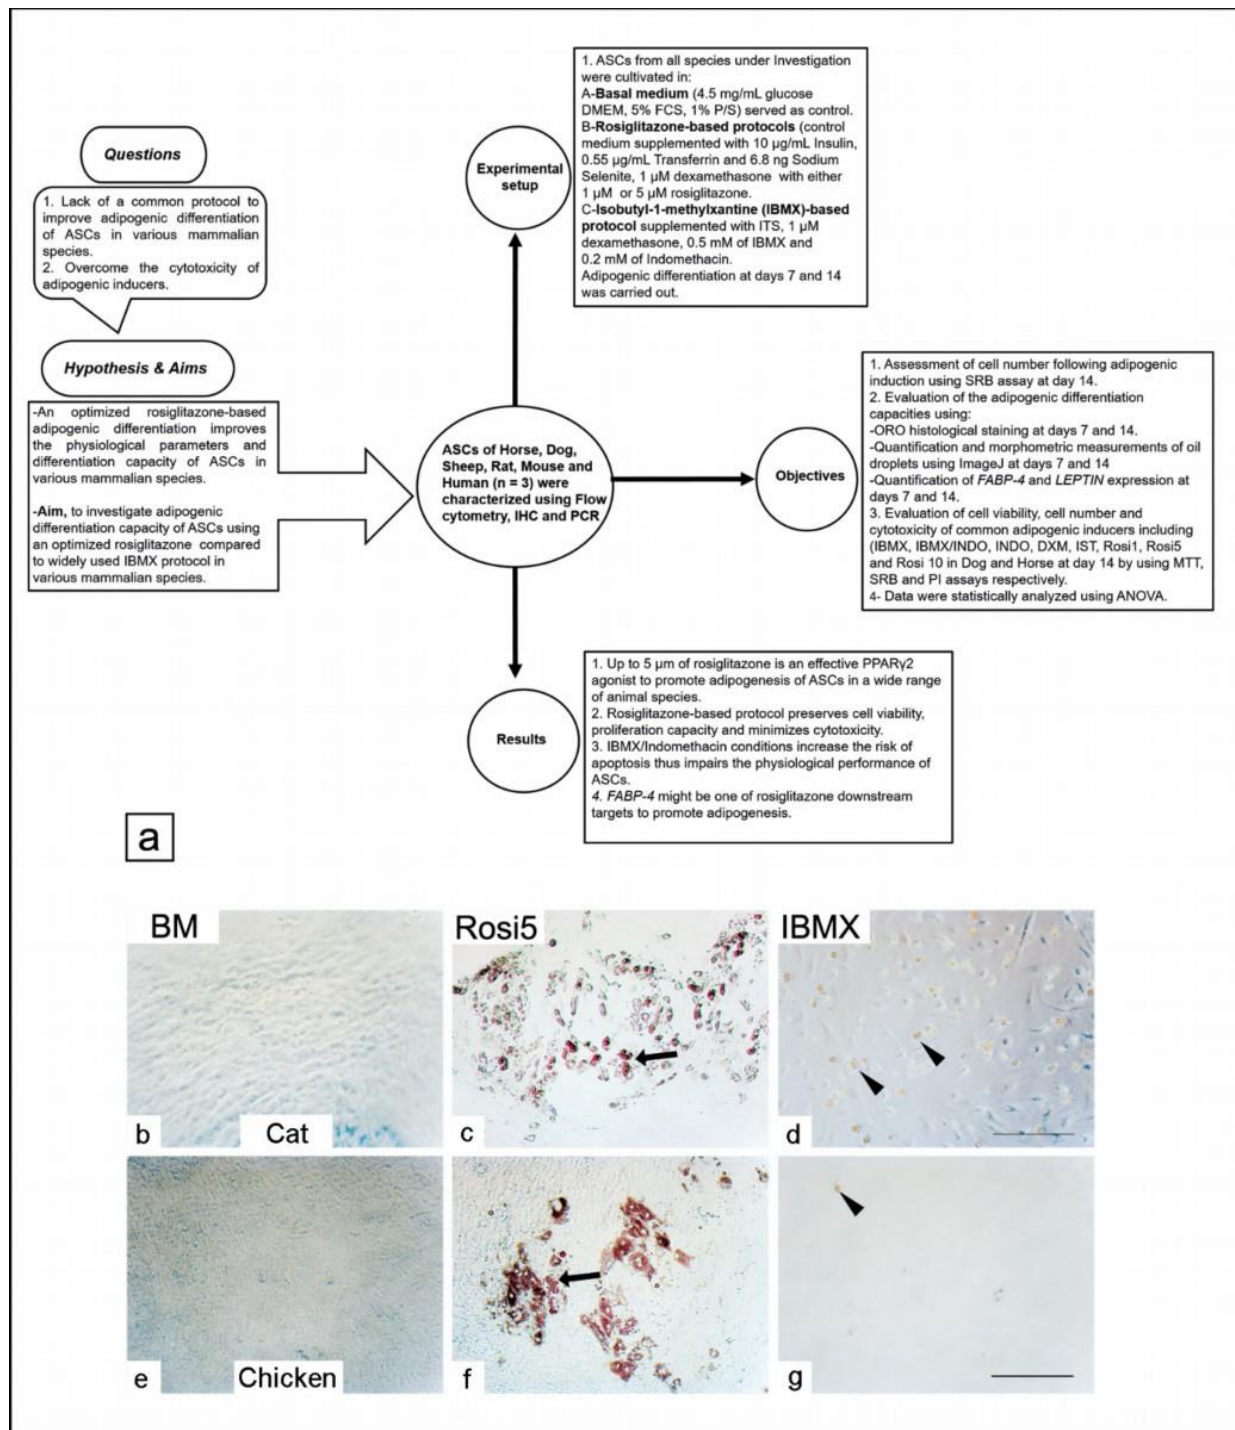

**Figure S1:** (a) This schematic diagram illustrates the study design including questions, hypothesis and aims, experimental flow, targeted objectives and the main results. (b–g) Representative images of 901 ASCs stained with Oil Red O (red) following adipogenic differentiation in 5 µM Rosiglitazone (Rosi 5) and 3-isobutyl-1-methylxanthine-based medium (IBMX) up to day 14 post induction in cat (c, d) and chicken (f, g). Non-induced cells in basal medium (BM, b, e) served as negative controls. Evidence of promoted adipogenic differentiation as indicated 904 by red fat droplets (black arrow) under 5 µM of rosiglitazone compared to IBMX-based protocol. Note: increased detached round cells (arrow head) in IBMX condition for both species. Scale bar = 100 µM.

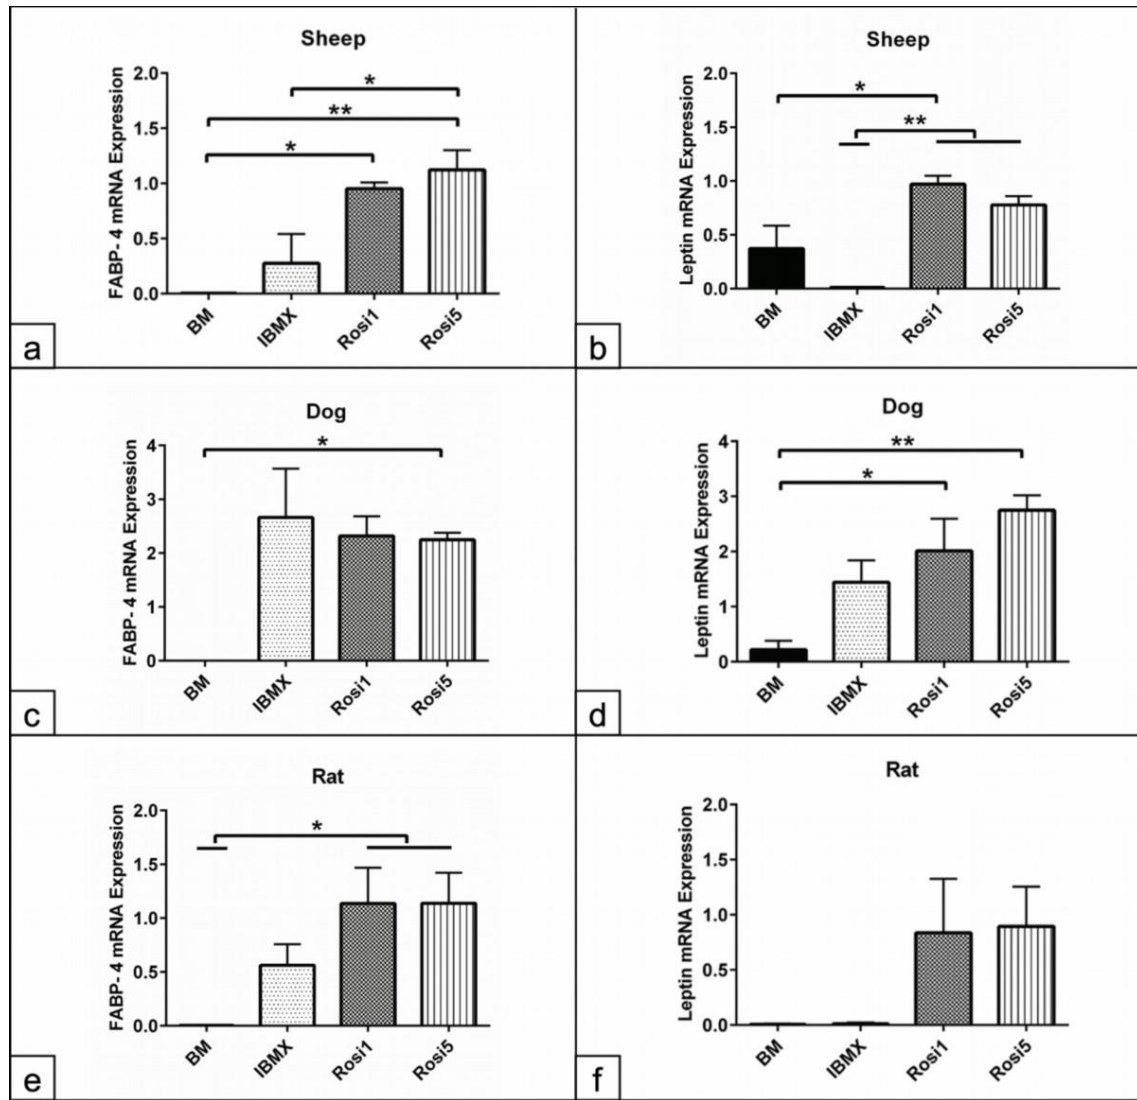

**Figure S2.** Quantification of the relevant adipogenic differentiation marker expression. (a–f) Quantitative RT-PCR of cells lysates from sheep (a, b), dog (c, d), rat (e, f) cells following 14 days of adipogenic induction in 3-isobutyl-1-methylxanthine-based medium (IBMX), 1  $\mu$ M rosiglitazone (Rosi 1), 5  $\mu$ M rosiglitazone medium. For all experimental groups, 1  $\mu$ g of the harvested RNA (n = 4) was reverse transcribed. By using the relevant primers, the adipogenic markers; Fatty acid binding proteins-4 (*FABP-4*) and *Leptin* expression were measured. The data analysis reveals the upregulation of *FABP-4* expression in the Rosi 1- and Rosi 5-, and IBMX-based conditions compared with BM in all species. All data presented as mean  $\pm$  SEM. \* = p < 0.05, \*\* = p < 0.01.

**Table S1:** Antibodies used for ASCs identification

| <i>Positive-Marker</i>    | <i>Company</i> | <i>Host species</i> | <i>Target</i> | <i>Human</i> | <i>Dog</i> | <i>Horse</i> | <i>Sheep</i> | <i>Rat</i> | <i>Mouse</i> |
|---------------------------|----------------|---------------------|---------------|--------------|------------|--------------|--------------|------------|--------------|
| <i>CD29 # Ha2/5</i>       | BD Pharmingen  | Hamster             | Ra            |              |            |              |              | +          | +            |
| <i>CD29 # MEM101A</i>     | Biomol         | Mouse               | Human         | +            | +          |              | +            |            |              |
| <i>CD44 # IM7</i>         | Thermofisher   | Rat                 | Mouse         | +            |            | +            |              | +          | +            |
| <i>CD44 # MEM-263</i>     | Novusbio       | Mouse               | COS-7 cells   | +            | +          |              | +            |            |              |
| <i>CD73 # 5F/B9</i>       | BD Pharmingen  | Mouse               | Rat           |              |            |              |              | +          |              |
| <i>CD90 # 5E10</i>        | Stemcell       | Mouse               | Human         | +            |            | +            |              |            |              |
| <i>CD90 # YKIX337.217</i> | Biorad         | Rat                 | Dog           |              | +          |              |              |            |              |
| <i>CD90 # OX-7</i>        | Biorad         | Mouse               | Rat           |              |            |              |              | +          | +            |
| <i>CD90 # Thy1.2</i>      | Thermofisher   | Rat                 | Mouse         |              |            |              |              |            |              |
| <i>CD105 # SN6</i>        | Biorad         | Mouse               | Human         | +            |            | +            |              |            |              |
| <i>MHC I # CVS22</i>      | Biorad         | Mouse               | Horse         |              |            | +            |              |            |              |
| <i>Negative-Marker</i>    |                |                     |               |              |            |              |              |            |              |
| <i>CD45 # UHCL1</i>       | Thermofisher   | Mouse               | Human         | +            | +          |              |              |            |              |
| <i>CD45 # OX-1</i>        | Biorad         | Mouse               | Rat           |              |            |              |              | +          |              |
| <i>CD45 # 30F11</i>       | Miltenyibiotec | Rat                 | Mouse         |              |            |              |              |            | +            |
| <i>MHC II # CVS20</i>     | Biorad         | Mouse               | Horse         | +            | +          | +            |              |            |              |
| <i>CD11b # WT.5</i>       | BD Pharmingen  | Mouse               | Rat           |              |            |              |              | +          |              |
| <i>CD41/CD61 #CO.35E4</i> | Biorad         | Mouse               | Sheep         |              |            | +            | +            |            |              |

(+) positive signal
